# Supplementary material for: iASPP overexpression is associated with clinical outcome in spinal chordoma and influences cellular proliferation, invasion, and sensitivity to cisplatin in vitro
Source: PubMed Central journal article supplement (PMC5620263; doi:10.18632/oncotarget.20190), 2017-08-11
Supplement: oncotarget-08-68365-s001.pdf [file oncotarget-08-68365-s001.pdf]

## iASPP overexpression is associated with clinical outcome in spinal chordoma and influences cellular proliferation, invasion, and sensitivity to cisplatin *in vitro*

### SUPPLEMENTARY MATERIALS

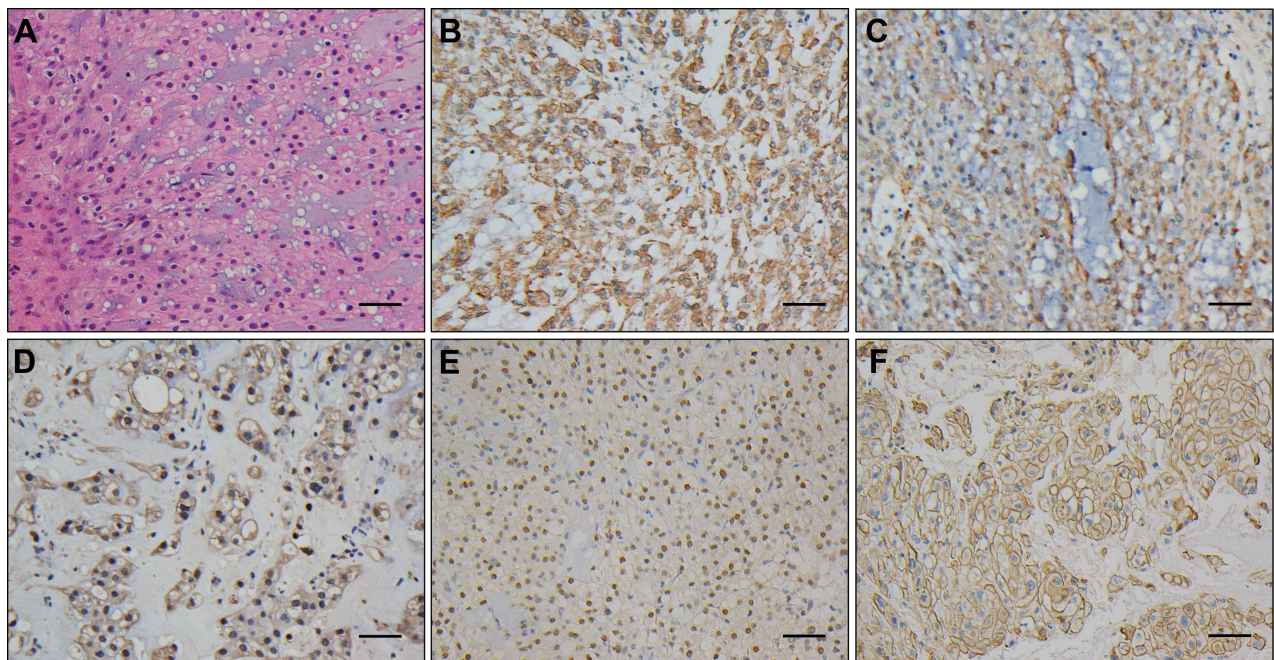

**Supplementary Figure 1: Pathological diagnosis of chordoma tissues.** (A) Hematoxylin eosin staining of chordoma tissues. (B–F) Immunohistochemistry staining with specific diagnostic biomarkers of chordoma, pan-cytokeratin (B), vimentin (C), S-100 (D), brachyury (E), and EMA (F). Bar scale = 50 μm.

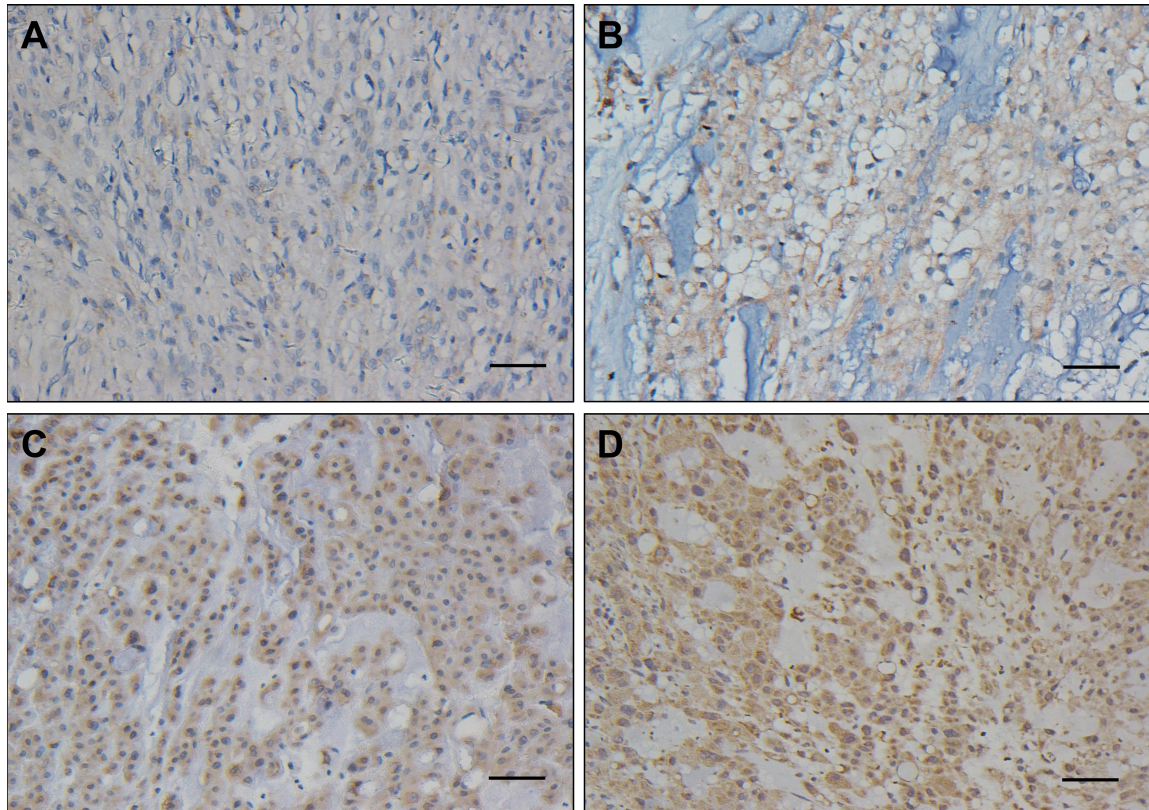

**Supplementary Figure 2: Staining intensity of iASPP in chordoma tissues.** Examples of (A) negative, (B) weak, (C) moderate, and (D) strong staining as assessed by two pathologists (described in Materials and Methods). Bar scale = 50  $\mu$ m.

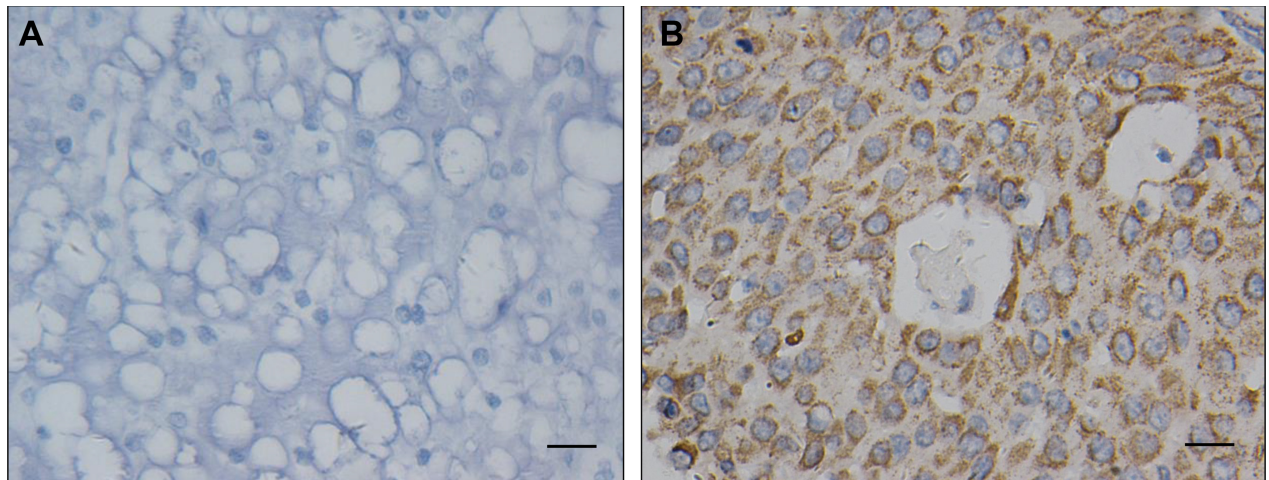

**Supplementary Figure 3: The immunohistochemical pictures of negative control and positive control tissues.** (A) Immunohistochemical staining of chordoma tissues incubated with phosphate-buffered saline buffer (PBS) to replace the primary antibody (negative control). (B) Immunohistochemical staining of human breast carcinoma with known iASPP positivity (positive control). Bar scale = 50  $\mu$ m.
